# Supplementary material
Source: MDPI journal article supplement (https://www.mdpi.com/2072-4292/16/8/1417)
Supplement: s1 [file s1]

Archive with 4 entries (4 files):
- Supplementary material 1.tif
- Supplementary material 2.tif
- Supplementary material 3.tif
- Supplementary material.pdf
